# Supplementary material for: From linked open data to molecular interaction: studying selectivity trends for ligands of the human serotonin and dopamine transporter
Source: PubMed Central journal article supplement (PMC5100691; doi:10.1039/c6md00207b), 2016-07-22
Supplement: MD-007-C6MD00207B-s001.pdf [file MD-007-C6MD00207B-s001.pdf]

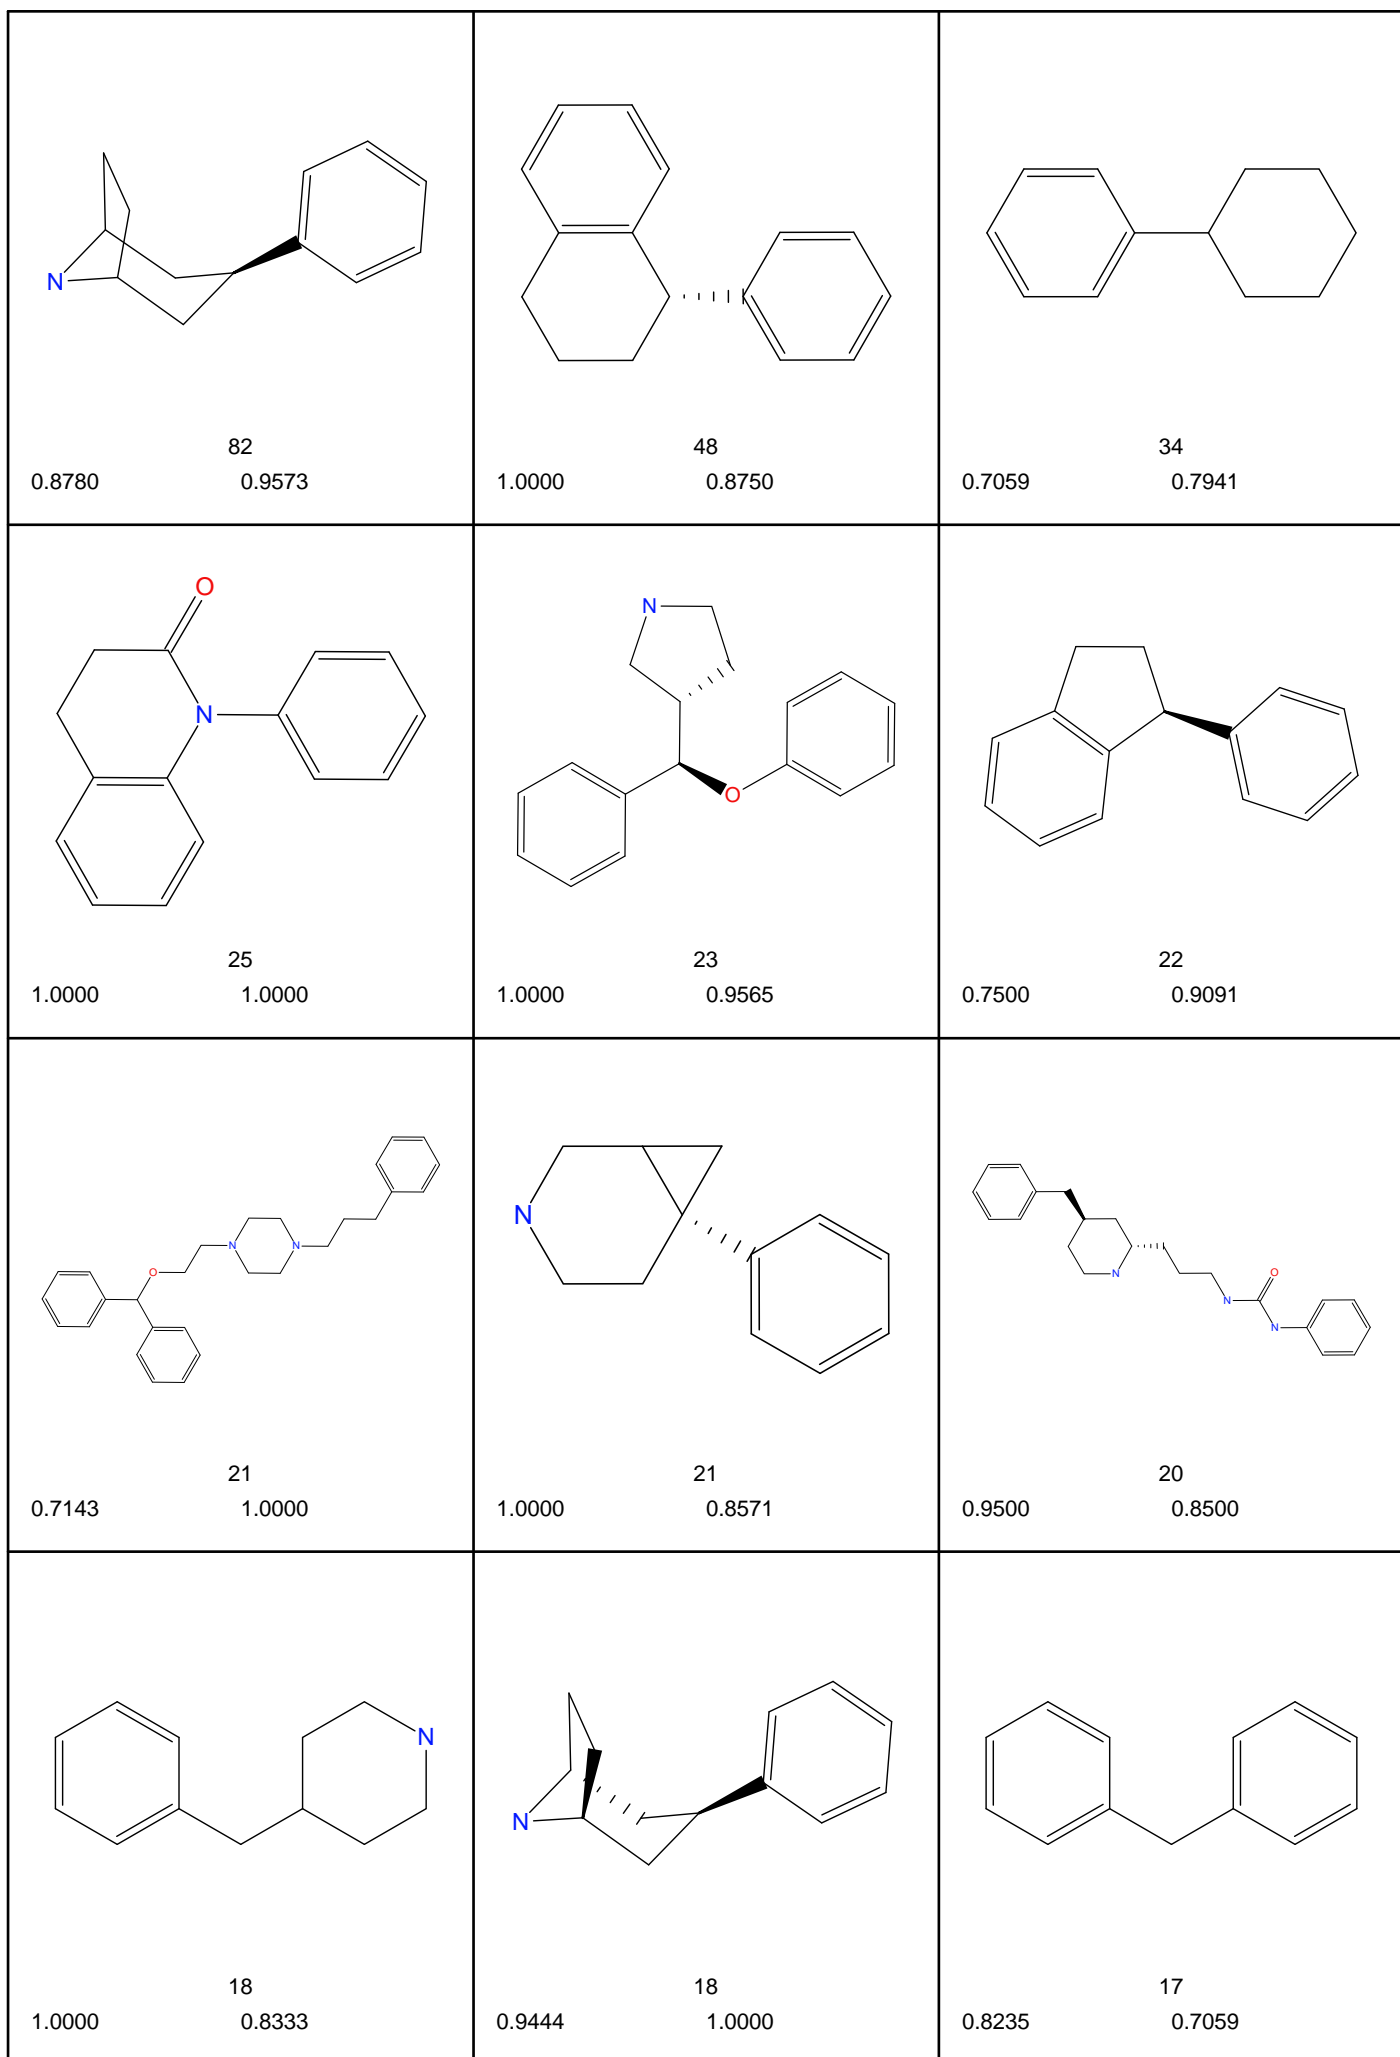

counts of unique compounds and mean activity labels (hSERT left, hDAT right)

Figure S1

24 promiscuous hSERT/hDAT scaffolds

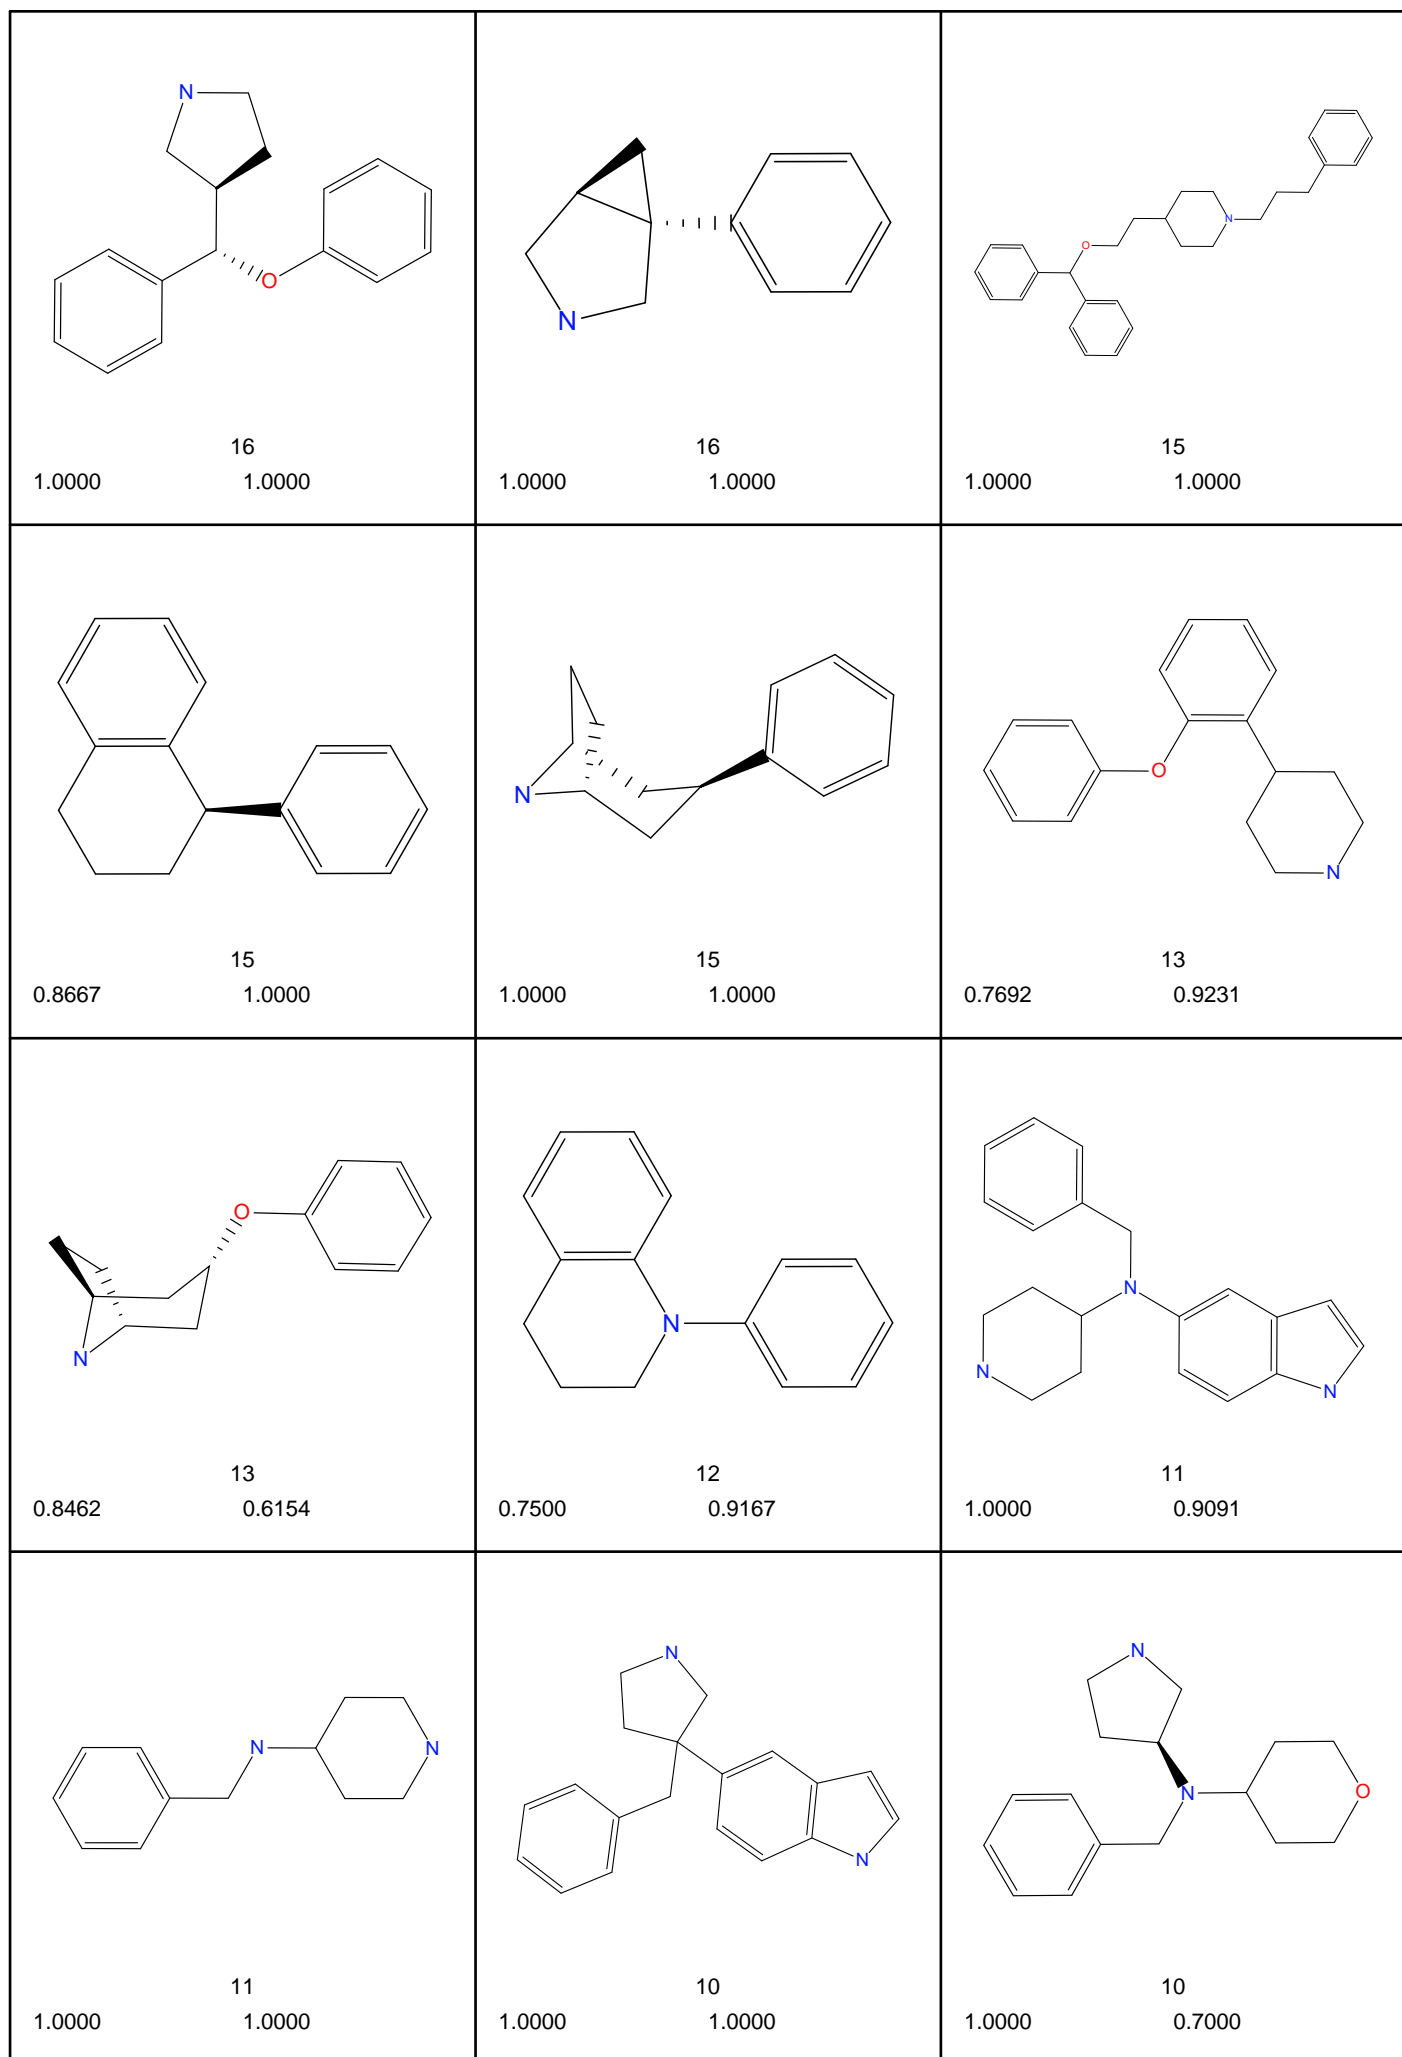

counts of unique compounds and mean activity labels (hSERT left, hDAT right)
