# Supplementary material for: From linked open data to molecular interaction: studying selectivity trends for ligands of the human serotonin and dopamine transporter
Source: PubMed Central journal article supplement (PMC5100691; doi:10.1039/c6md00207b), 2016-07-22

frequency distribution of frequency in frequency (180) (20)

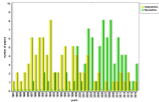

Supplement: MD-007-C6MD00207B-s003.pdf [file MD-007-C6MD00207B-s003.pdf]
