# Supplementary material for: From linked open data to molecular interaction: studying selectivity trends for ligands of the human serotonin and dopamine transporter
Source: PubMed Central journal article supplement (PMC5100691; doi:10.1039/c6md00207b), 2016-07-22

### Protein-Ligand RMSD

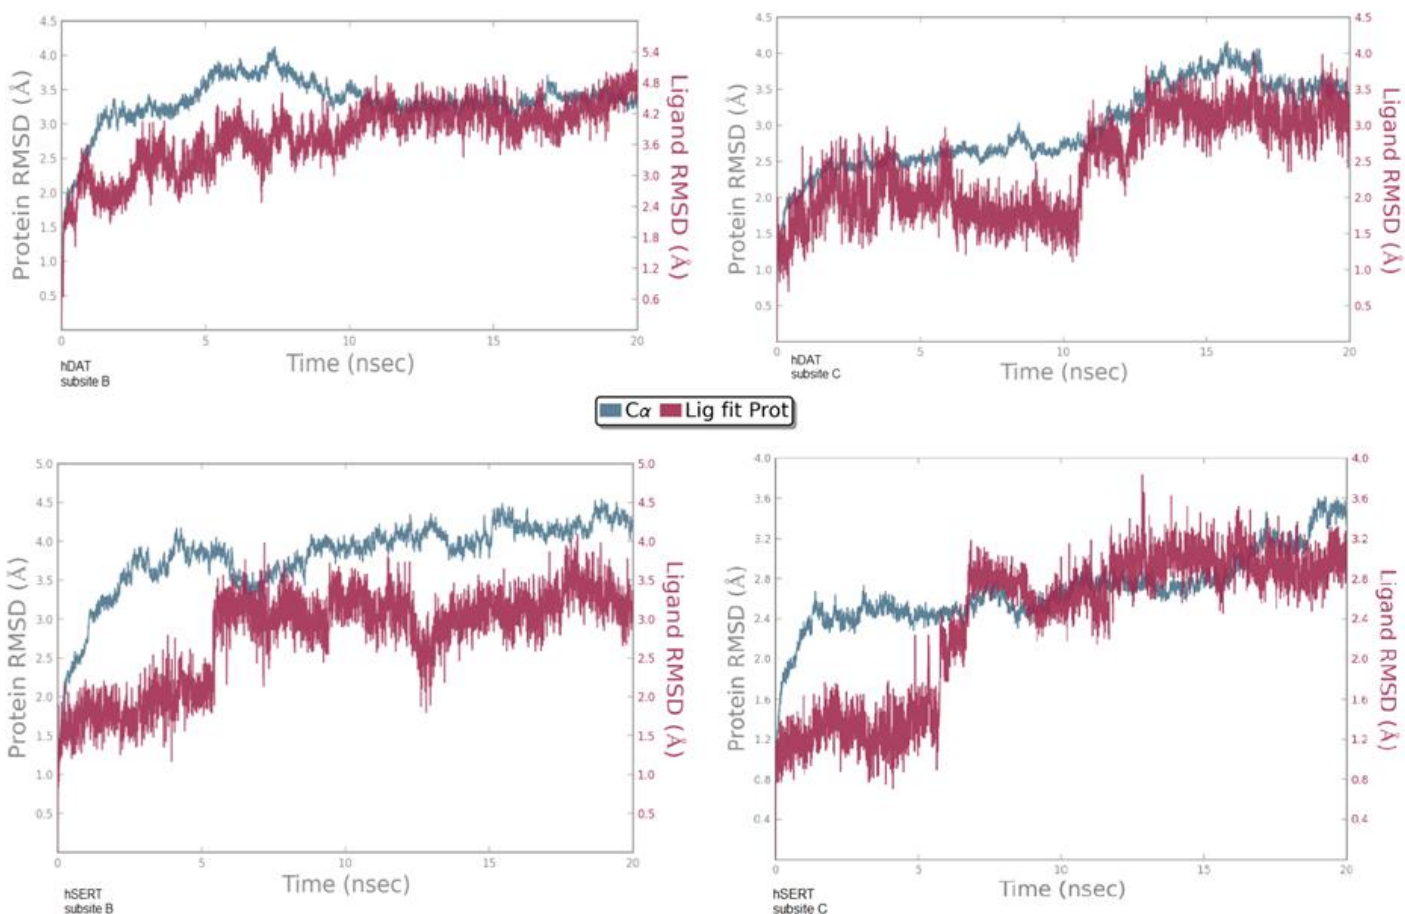

### Protein Secondary Structure

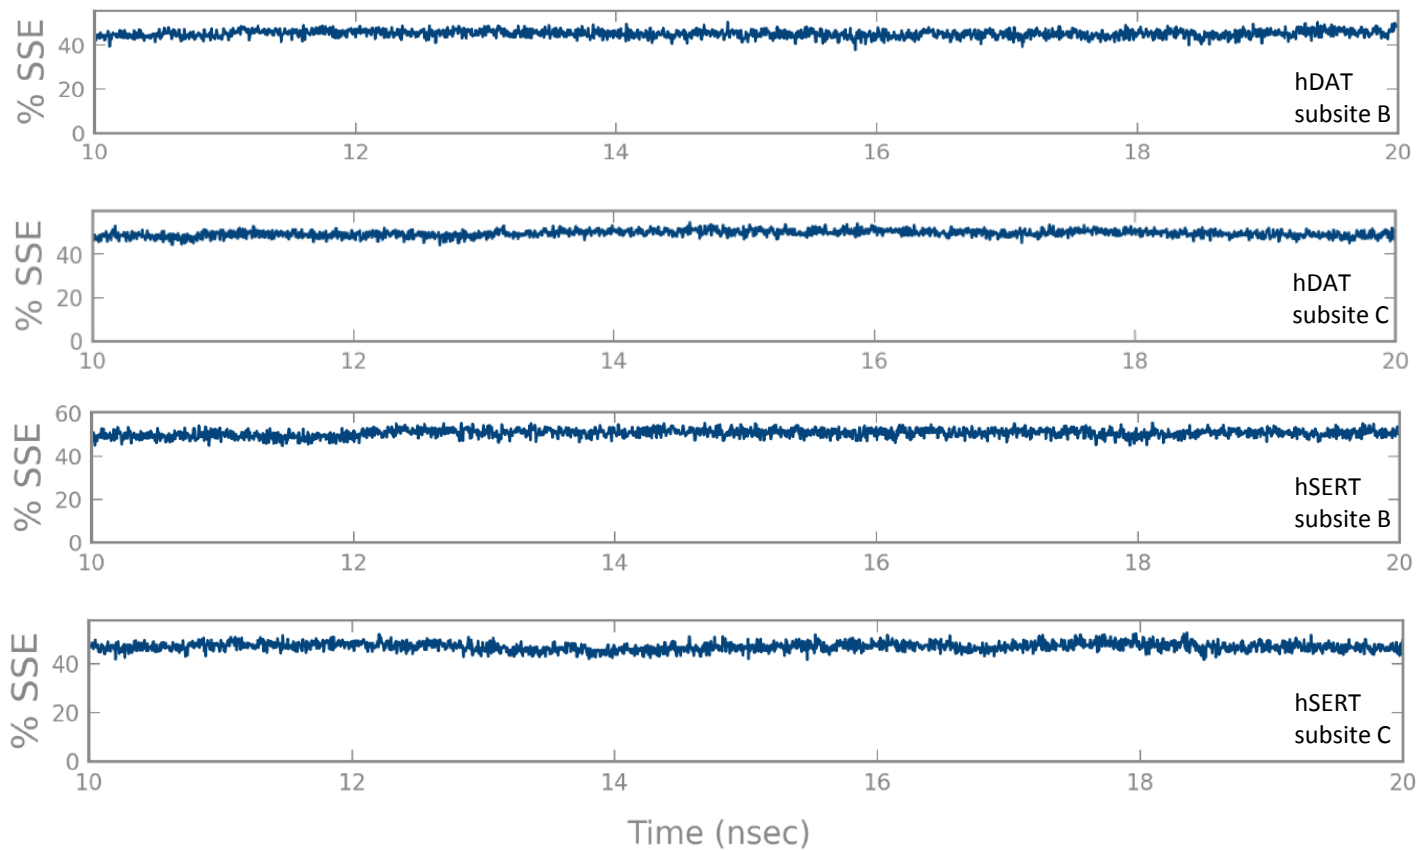

### Protein-Ligand Contacts

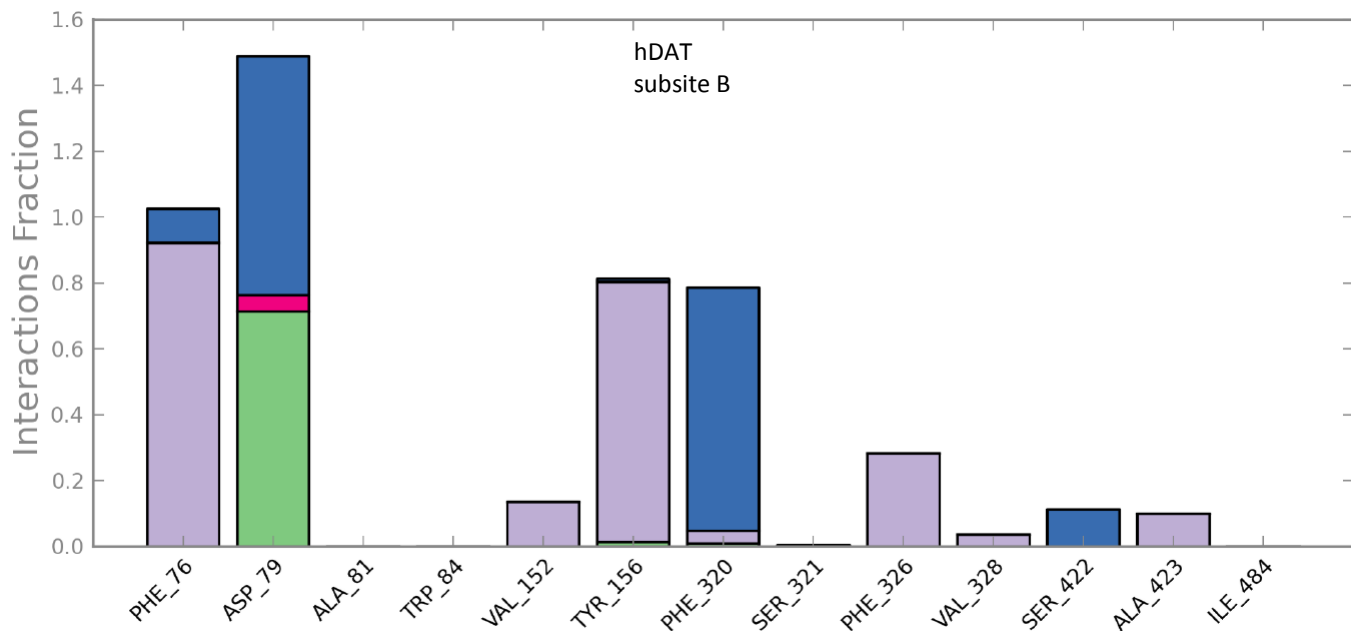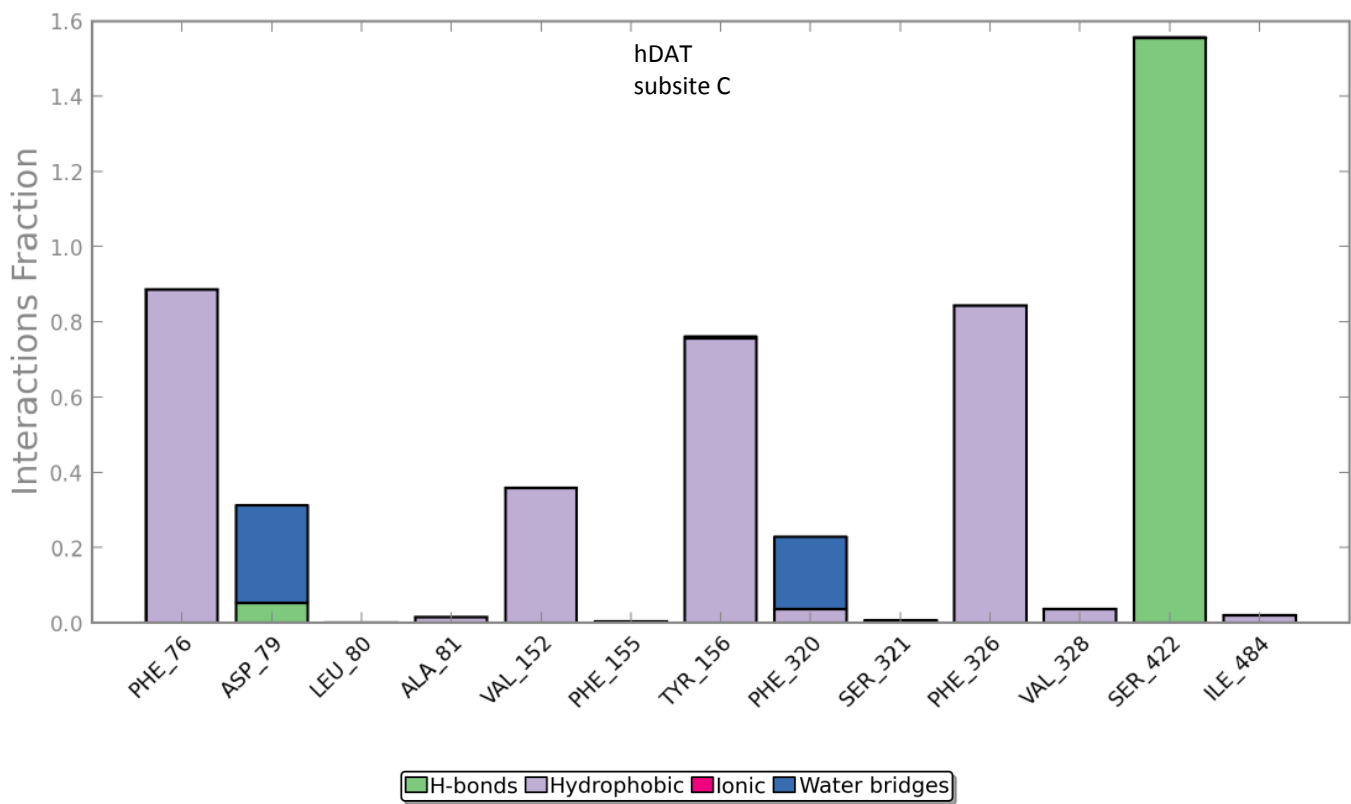

Legend: H-bonds (green), Hydrophobic (purple), Ionic (pink), Water bridges (blue)

# Protein-Ligand Contacts

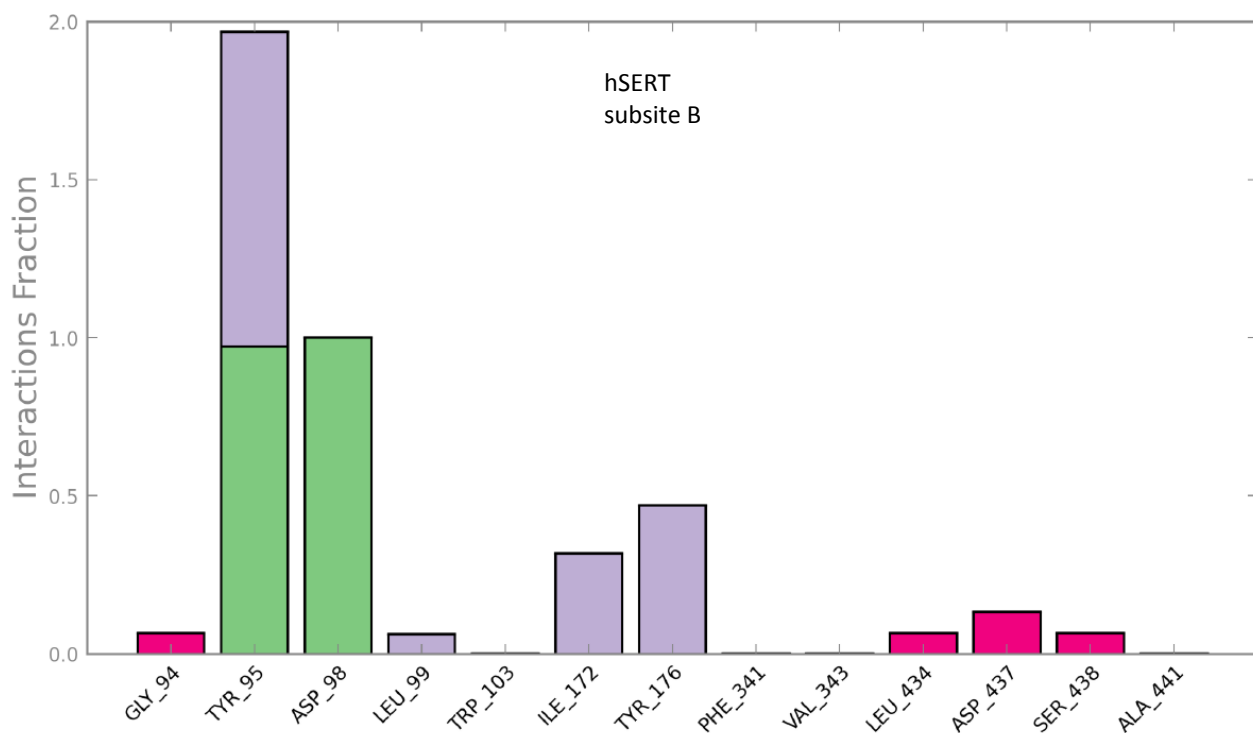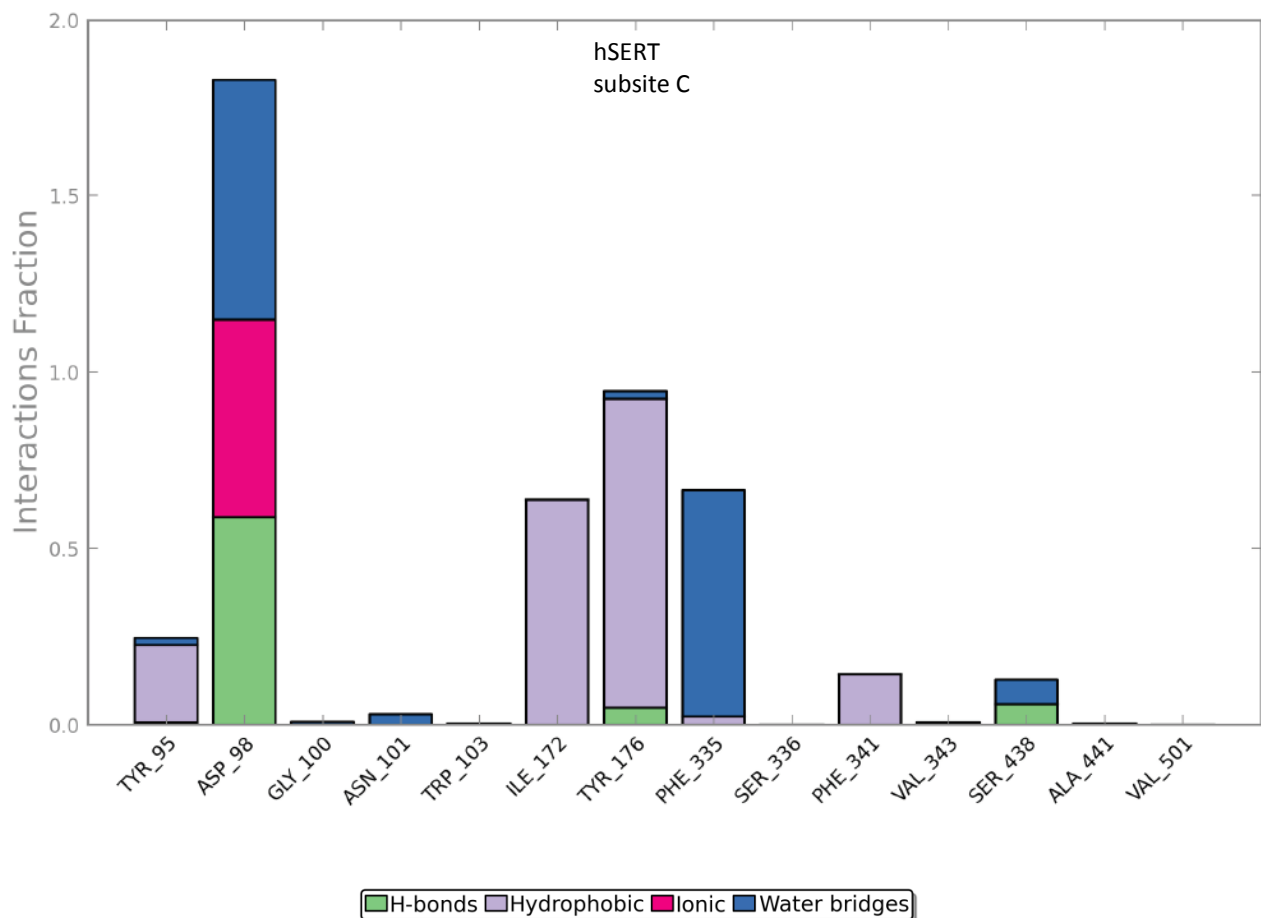

# Protein-Ligand Contacts over time

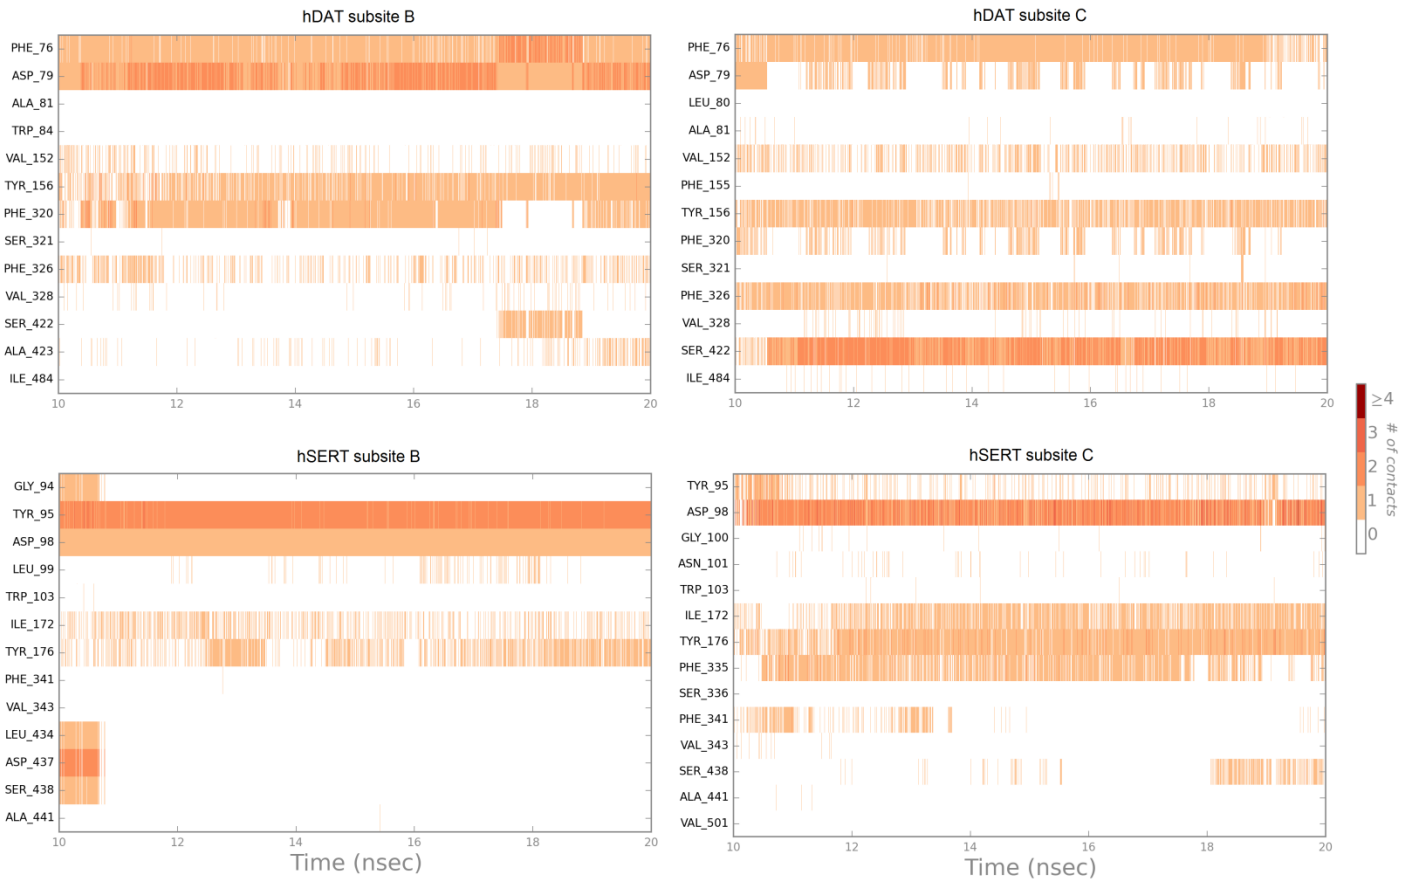

Supplement: MD-007-C6MD00207B-s007.pdf [file MD-007-C6MD00207B-s007.pdf]
